# Supplementary material for: Deep neural networks for accurate predictions of crystal stability
Source: Springer Nature journal article supplement (doi:10.1038/s41467-018-06322-x), 2018-09-12
Supplement: 41467_2018_6322_MOESM1_ESM.pdf [file 41467_2018_6322_MOESM1_ESM.pdf]

**Supplementary Information for:**

**Deep Neural Networks for Accurate Predictions of Crystal Stability**

**By Weike Ye *et al.***

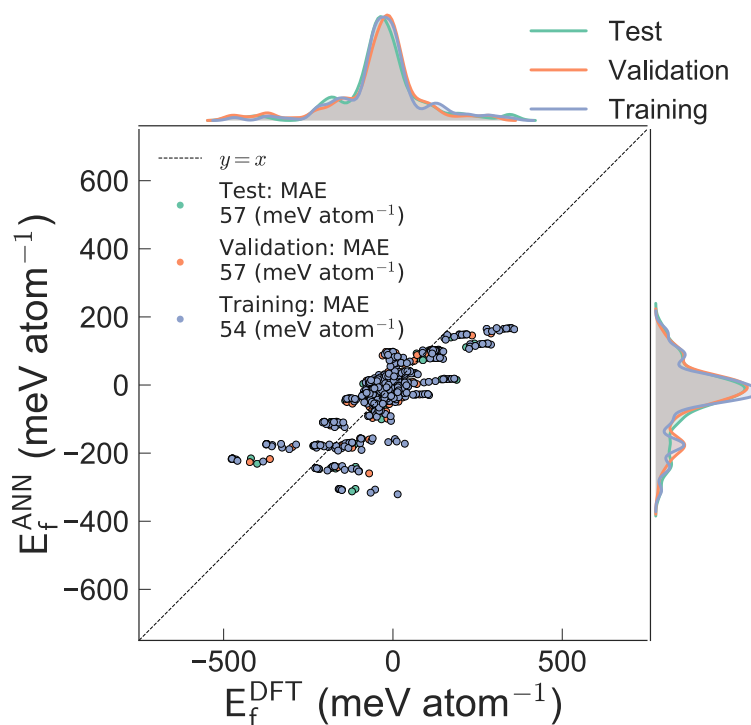

**Supplementary Figure 1 | Performance of multiple linear regression model on  $E_f^{\text{DFT}}$  of unmixed garnets.** The high training, validation and test mean absolute errors (MAEs) of 54, 57 and 57  $\text{meV atom}^{-1}$  indicate that a simple linear functional form is insufficient to model the relationship between  $E_f^{\text{DFT}}$  and the Pauling electronegativity and ionic radii descriptors. The  $R^2$  for training, validation and test data are 0.63, 0.63 and 0.63, respectively. The black line (dashed) in the figure is the identity line serving as reference.

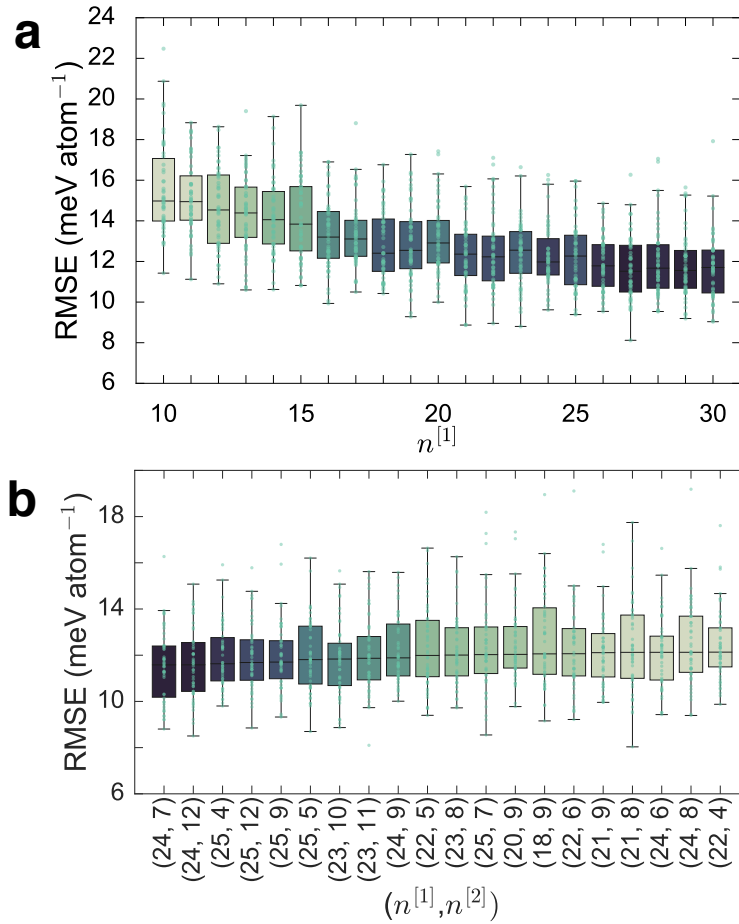

**Supplementary Figure 2 | Optimization of artificial neural network (ANN) architecture. a,** Plot of the root mean square error (RMSE) loss metric versus number of neurons in a single-hidden-layer ANN model. The RMSE converges at  $n^{[1]} \sim 20$ , and the smallest standard deviation is observed at  $n^{[1]} = 24$ . **b,** Plot of the RMSE loss metric versus number of neurons in a two-hidden-layer deep neural network (DNN) model for unmixed garnets. Only the 20 best-performing models are shown for brevity. The RMSE loss metric achieved by the DNN model is similar to that of the single-hidden-layer ANN model. The box shows the quartiles of the dataset while the whiskers extend to show the rest of the distribution.

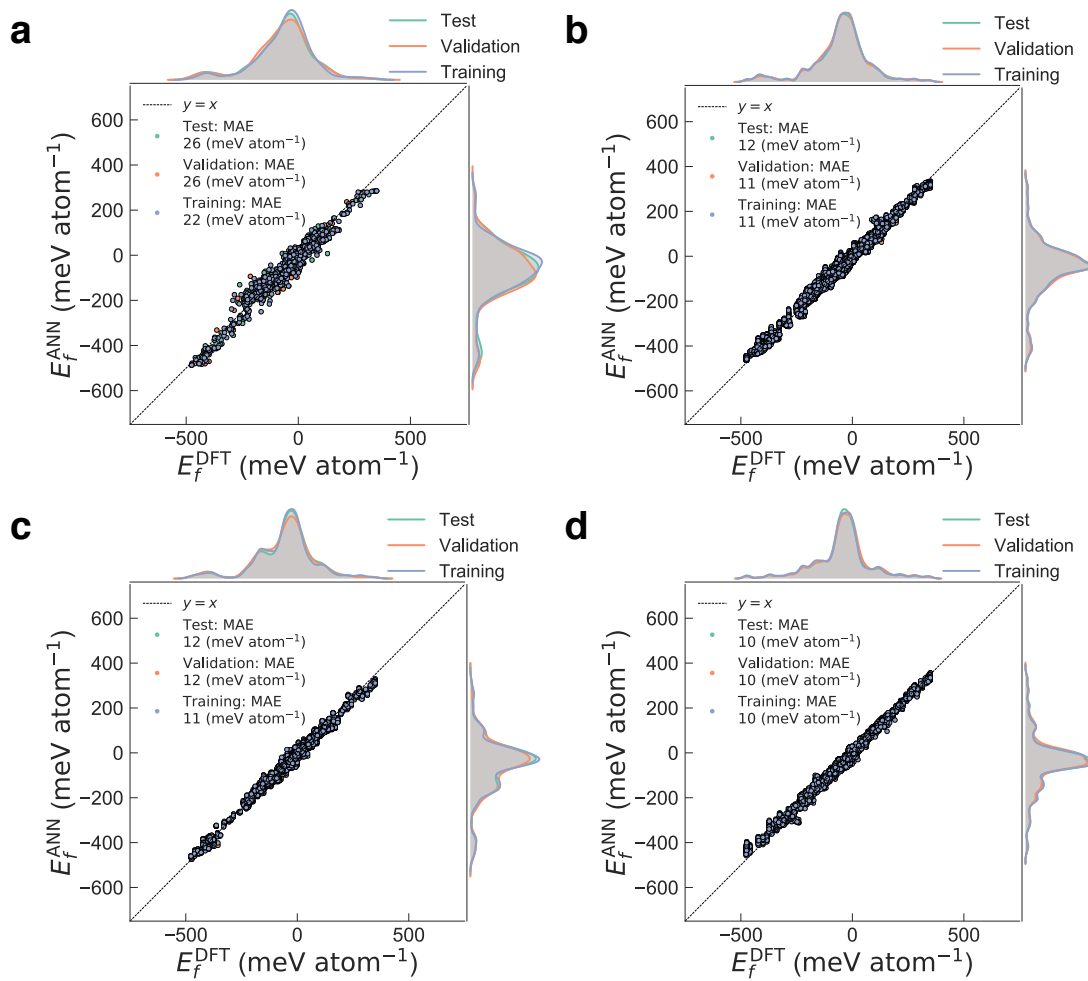

**Supplementary Figure 3 | Performance of optimized artificial neural network models for garnets.** Plot of  $E_f^{ANN}$  against  $E_f^{DFT}$  for **a.** “averaged” ANN model trained on all unmixed and mixed garnets, **b.** ordered DNN model trained on unmixed garnets with C-mixed garnets (standard deviations of  $E_f^{DFT}$  for training, validation and test set are: 130, 128 and 130  $\text{meV atom}^{-1}$ ), **c.** ordered DNN model trained on unmixed garnets with A-mixed garnets (standard deviations of  $E_f^{DFT}$  for training, validation and test set are: 132, 134 and 131  $\text{meV atom}^{-1}$ ), and **d.** ordered DNN model trained on unmixed garnets with D-mixed garnets (standard deviations of  $E_f^{DFT}$  for training, validation and test set are: 126, 126 and 127  $\text{meV atom}^{-1}$ ). The black lines (dashed) in all subfigures are the identity lines serving as references.

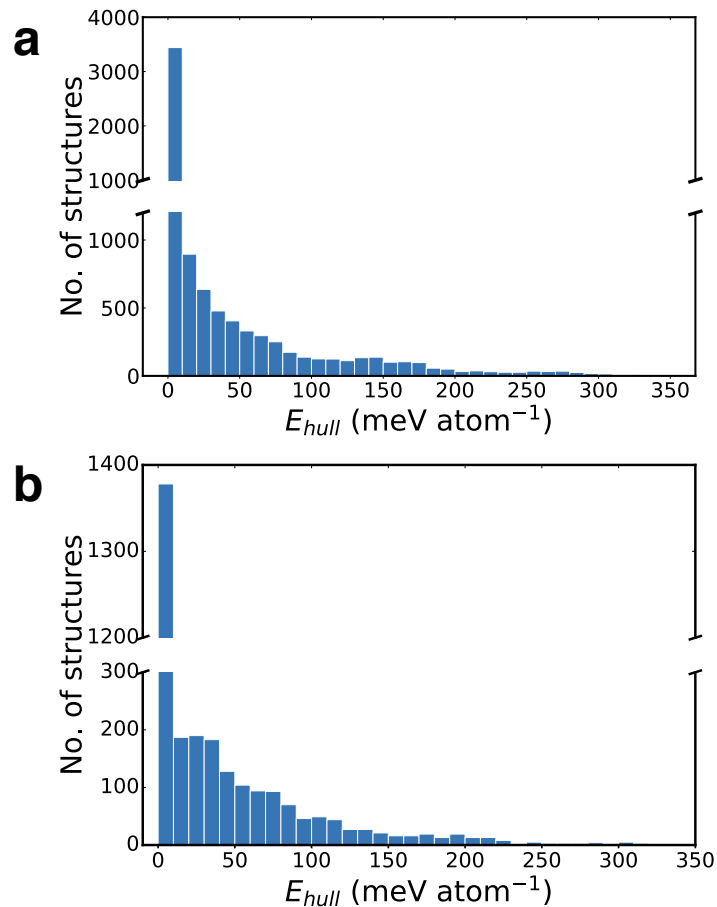

**Supplementary Figure 4 | Histograms of  $E_{hull}$  predicted using the optimized neural network models for garnets and perovskites. a.** A total of 8,427 garnet compositions were generated based on 2:1 mixing on the C or D sites, or 1:1 mixing on the A site. Only the ordering with the lowest  $E_{hull}$  is presented at each composition. Of the 8,385 compositions, 2,307 compositions are predicted to have  $E_{hull} = 0$  meV atom<sup>-1</sup>. **b.** A total of 2,791 perovskite compositions were generated based on 1:1 mixing on the A or D sites. Only the ordering with lowest  $E_{hull}$  is presented at each composition. Of the 2,791 compositions, 1,147 compositions are predicted to have  $E_{hull} = 0$  meV atom<sup>-1</sup>.

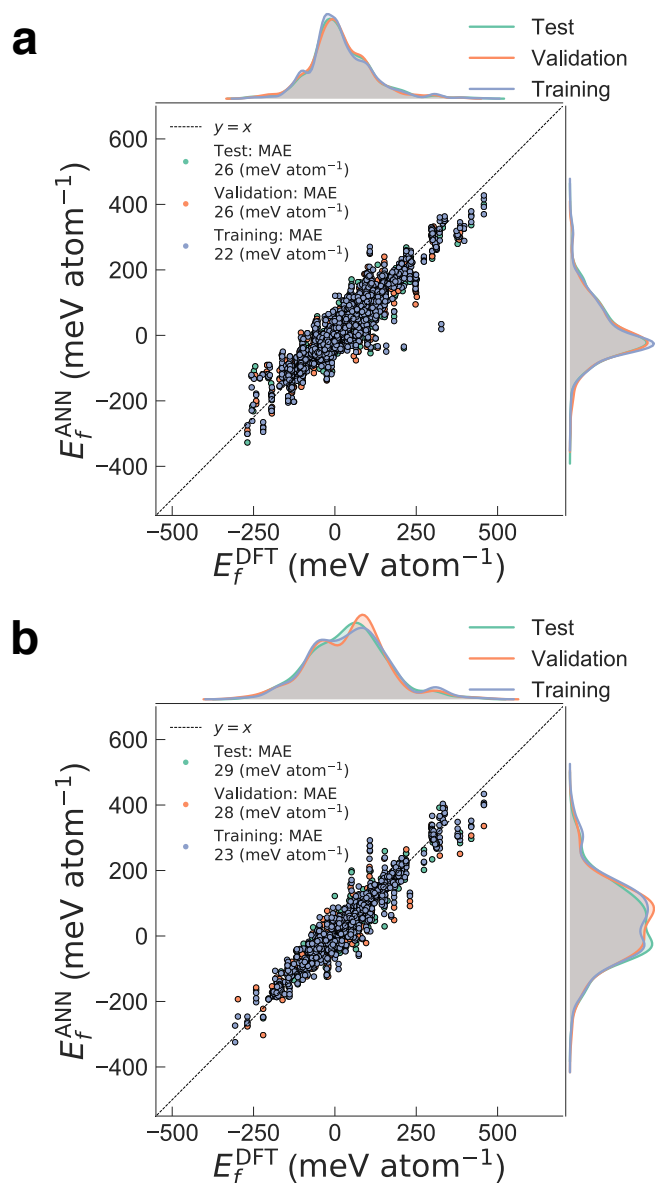

**Supplementary Figure 5 | Performance of optimized artificial neural network models for perovskites.** Plot of  $E_f^{ANN}$  against  $E_f^{DFT}$  for **a.** ordered ANN model trained on unmixed with A-mixed perovskites (standard deviation of  $E_f^{DFT}$  for training, validation and test sets are: 95, 94 and 96 meV atom<sup>-1</sup>), and **b.** ordered ANN model trained on unmixed with B-mixed perovskites (standard deviations of  $E_f^{DFT}$  for training, validation and test sets are: 121, 117 and 115 meV atom<sup>-1</sup>). The black lines (dashed) in a. and b. are the identity lines serving as references.

**Supplementary Table 1 | Binary oxides used as reference states used for garnet  $E_f$  calculations.**

| Element | Oxidation State | Binary Oxide      | ICSD ID | Materials ID |
|---------|-----------------|-------------------|---------|--------------|
| Na      | 1               | Na <sub>2</sub> O | 60435   | mp-2352      |
| Li      | 1               | Li <sub>2</sub> O | 57411   | mp-1960      |
| Ag      | 1               | Ag <sub>2</sub> O | 174087  | mp-353       |
| Cs      | 1               | Cs <sub>2</sub> O | 27919   | mp-7988      |
| Rb      | 1               | Rb <sub>2</sub> O | 77676   | mp-1394      |
| K       | 1               | K <sub>2</sub> O  | 180571  | mp-971       |
| Tl      | 1               | Tl <sub>2</sub> O | 77699   | mp-27484     |
| Cd      | 2               | CdO               | 24802   | mp-1132      |
| Zn      | 2               | ZnO               | 31060   | mp-2133      |
| Ba      | 2               | BaO               | 52278   | mp-1342      |
| Sr      | 2               | SrO               | 28904   | mp-2472      |
| Ca      | 2               | CaO               | 52783   | mp-2605      |
| Mg      | 2               | MgO               | 52026   | mp-1265      |
| Be      | 2               | BeO               | 29271   | mp-2542      |
| Co      | 2               | CoO               | 53057   | mp-19079     |
| Ni      | 2               | NiO               | 60435   | mp-19009     |
| Hg      | 2               | HgO               | 40316   | mp-1224      |
| Pb      | 2               | PbO               | 26596   | mp-672237    |
| Pd      | 2               | PdO               | 26598   | mp-1336      |

**Continued from previous page**

| Element | Oxidation State | Binary Oxide                   | ICSD ID | Materials ID |
|---------|-----------------|--------------------------------|---------|--------------|
| Cu      | 2               | CuO                            | 628618  | mp-1692      |
| La      | 3               | La <sub>2</sub> O <sub>3</sub> | 96201   | mp-2292      |
| Cr      | 3               | Cr <sub>2</sub> O <sub>3</sub> | 201102  | mp-19399     |
| Al      | 3               | Al <sub>2</sub> O <sub>3</sub> | 43732   | mp-1143      |
| Bi      | 3               | Bi <sub>2</sub> O <sub>3</sub> | 94229   | mp-23262     |
| Pr      | 3               | Pr <sub>2</sub> O <sub>3</sub> | 96203   | mp-16705     |
| Sm      | 3               | Sm <sub>2</sub> O <sub>3</sub> | 647461  | mp-218       |
| Eu      | 3               | Eu <sub>2</sub> O <sub>3</sub> | 40472   | <sup>1</sup> |
| Gd      | 3               | Gd <sub>2</sub> O <sub>3</sub> | 33652   | mp-504886    |
| Tb      | 3               | Tb <sub>2</sub> O <sub>3</sub> | 647509  | mp-1056      |
| Dy      | 3               | Dy <sub>2</sub> O <sub>3</sub> | 27994   | mp-2345      |
| Ho      | 3               | Ho <sub>2</sub> O <sub>3</sub> | 41268   | mp-812       |
| Er      | 3               | Er <sub>2</sub> O <sub>3</sub> | 630897  | mp-679       |
| Tm      | 3               | Tm <sub>2</sub> O <sub>3</sub> | 78582   | mp-1767      |
| Yb      | 3               | Yb <sub>2</sub> O <sub>3</sub> | 33658   | mp-2814      |
| Lu      | 3               | Lu <sub>2</sub> O <sub>3</sub> | 151762  | mp-1427      |
| Y       | 3               | Y <sub>2</sub> O <sub>3</sub>  | 181825  | mp-2652      |

<sup>1</sup> There is no corresponding entry in MP. The energy was obtained by applying DFT calculation on the structure using MP-compatible parameters.



**Continued from previous page**

| Element | Oxidation State | Binary Oxide                   | ICSD ID | Materials ID |
|---------|-----------------|--------------------------------|---------|--------------|
| Rh      | 3               | Rh <sub>2</sub> O <sub>3</sub> | 181829  | mp-542734    |
| Ga      | 3               | Ga <sub>2</sub> O <sub>3</sub> | 166198  | mp-886       |
| Sc      | 3               | Sc <sub>2</sub> O <sub>3</sub> | 647397  | mp-216       |
| Nd      | 3               | Nd <sub>2</sub> O <sub>3</sub> | 645664  | mp-1045      |
| Au      | 3               | Au <sub>2</sub> O <sub>3</sub> | 8014    | mp-27253     |
| B       | 3               | B <sub>2</sub> O <sub>3</sub>  | 36066   | mp-306       |
| Mn      | 3               | Mn <sub>2</sub> O <sub>3</sub> | 76087   | mp-542877    |
| Hf      | 4               | HfO <sub>2</sub>               | 27313   | mp-352       |
| Zr      | 4               | ZrO <sub>2</sub>               | 68782   | mp-2858      |
| Ge      | 4               | GeO <sub>2</sub>               | 92551   | mp-470       |
| Ti      | 4               | TiO <sub>2</sub>               | 69331   | mp-2657      |
| Si      | 4               | SiO <sub>2</sub>               | 200726  | mp-7000      |
| Ru      | 4               | RuO <sub>2</sub>               | 56007   | mp-825       |
| Sn      | 4               | SnO <sub>2</sub>               | 39173   | mp-856       |
| Pt      | 4               | PtO <sub>2</sub>               | 647320  | mp-1285      |
| Mo      | 4               | MoO <sub>2</sub>               | 36263   | mp-510536    |
| Re      | 4               | ReO <sub>2</sub>               | 24060   | mp-7228      |

Continued from previous page

| Element | Oxidation State | Binary Oxide                             | ICSD ID      | Materials ID |
|---------|-----------------|------------------------------------------|--------------|--------------|
| Se      | 4               | SeO <sub>2</sub>                         | 412234       | mp-726       |
| Te      | 4               | TeO <sub>2</sub>                         | 26844        | mp-2125      |
| In      | 3               | In <sub>2</sub> O <sub>3</sub>           | 181833       | mp-22598     |
| Tc      | 4               | TcO <sub>2</sub>                         | 173153       | mp-33137     |
| Ir      | 4               | IrO <sub>2</sub>                         | 640887       | mp-2723      |
| Os      | 4               | OsO <sub>2</sub>                         | 30400        | mp-996       |
| Nb      | 5               | Nb <sub>2</sub> O <sub>5</sub>           | 25750        | <sup>2</sup> |
| P       | 5               | P <sub>2</sub> O <sub>5</sub>            | 40865        | mp-562613    |
| Sb      | 5               | Sb <sub>2</sub> O <sub>5</sub>           | 1422         | mp-1705      |
| Ta      | 5               | Ta <sub>2</sub> O <sub>5</sub>           | <sup>3</sup> | mvc-4415     |
| As      | 5               | As <sub>2</sub> O <sub>5</sub>           | 10015        | mp-555434    |
| V       | 5               | V <sub>2</sub> O <sub>5</sub>            | 40488        | mp-25620     |
| W       | 6               | WO <sub>3</sub>                          | 50728        | mp-19342     |
| Fe      | 3               | $\alpha$ -Fe <sub>2</sub> O <sub>3</sub> | 161283       | mp-24972     |
| Fe      | 2               | FeO                                      | 633029       | mp-18905     |

<sup>2</sup> There is no corresponding entry in MP. The energy was obtained by applying DFT calculation on the structure using MP-compatible parameters.

<sup>3</sup> This structure is not included in ICSD, but the DFT calculation from MP shows that it has a calculated formation energy of -23.489 eV formula unit(fu)<sup>-1</sup>, which is close to reported experimental value (-21.209 eV fu<sup>-1</sup>)<sup>4</sup>.

**Supplementary Table 2 | Elements used in generating perovskite and corresponding binary oxides and used as reference states used for perovskite  $E_f$  calculations.**

| Element | Oxidation State | Binary Oxide                   | ICSD ID | Materials ID |
|---------|-----------------|--------------------------------|---------|--------------|
| Ag      | 1               | Ag <sub>2</sub> O              | 173984  | mp-353       |
| Al      | 3               | Al <sub>2</sub> O <sub>3</sub> | 60419   | mp-1143      |
| Au      | 3               | Au <sub>2</sub> O <sub>3</sub> | 8014    | mp-27253     |
| As      | 5               | As <sub>2</sub> O <sub>5</sub> | 10015   | mp-555434    |
| Ba      | 2               | BaO                            | 616004  | mp-1342      |
| Bi      | 3               | Bi <sub>2</sub> O <sub>3</sub> | 15072   | mp-23262     |
| Ca      | 2               | CaO                            | 60704   | mp-2605      |
| Cd      | 2               | CdO                            | 181057  | mp-1132      |
| Ce      | 3               | Ce <sub>2</sub> O <sub>3</sub> | 96202   | mp-542313    |
| Ce      | 4               | CeO <sub>2</sub>               | 164225  | mp-20194     |
| Co      | 2               | CoO                            | 9865    | mp-19079     |
| Co      | 3               | Co <sub>2</sub> O <sub>3</sub> |         | mvc-852      |
| Cr      | 3               | Cr <sub>2</sub> O <sub>3</sub> | 201102  | mp-19399     |
| Cr      | 4               | CrO <sub>2</sub>               | 166021  | mp-19177     |
| Cs      | 1               | Cs <sub>2</sub> O              | 27919   | mp-7988      |
| Cu      | 2               | CuO                            | 653723  | mp-1692      |
| Dy      | 3               | Dy <sub>2</sub> O <sub>3</sub> | 96208   | mp-2345      |
| Er      | 3               | Er <sub>2</sub> O <sub>3</sub> | 39521   | mp-679       |
| Eu      | 3               | Eu <sub>2</sub> O <sub>3</sub> | 40472   |              |
| Fe      | 2               | FeO                            | 633029  | mp-18905     |
| Fe      | 3               | Fe <sub>2</sub> O <sub>3</sub> | 161283  | mp-24972     |
| Fe      | 4               | FeO <sub>2</sub>               |         | mp-850222    |
| Ga      | 3               | Ga <sub>2</sub> O <sub>3</sub> | 34243   | mp-886       |
| Gd      | 3               | Gd <sub>2</sub> O <sub>3</sub> | 152449  | mp-504886    |
| Ge      | 4               | GeO <sub>2</sub>               | 158592  | mp-470       |
| Hf      | 4               | HfO <sub>2</sub>               | 172165  | mp-352       |

Continued from previous page

| Element | Oxidation State | Binary Oxide                   | ICSD ID | Materials ID |
|---------|-----------------|--------------------------------|---------|--------------|
| Hg      | 2               | HgO                            | 40316   | mp-1224      |
| Ho      | 3               | Ho <sub>2</sub> O <sub>3</sub> | 44516   | mp-812       |
| I       | 5               | I <sub>2</sub> O <sub>5</sub>  | 182672  | mp-23261     |
| In      | 3               | In <sub>2</sub> O <sub>3</sub> | 640179  | mp-22598     |
| Ir      | 4               | IrO <sub>2</sub>               | 84577   | mp-2723      |
| K       | 1               | K <sub>2</sub> O               | 44674   | mp-971       |
| La      | 3               | La <sub>2</sub> O <sub>3</sub> | 96201   | mp-2292      |
| Li      | 1               | Li <sub>2</sub> O              | 54368   | mp-1960      |
| Lu      | 3               | Lu <sub>2</sub> O <sub>3</sub> | 642477  | mp-1427      |
| Mg      | 2               | MgO                            | 41990   | mp-1265      |
| Mn      | 2               | MnO                            | 28898   | mp-714882    |
| Mn      | 3               | Mn <sub>2</sub> O <sub>3</sub> | 9091    | mp-542877    |
| Mn      | 4               | MnO <sub>2</sub>               | 20227   | mp-19395     |
| Mo      | 4               | MoO <sub>2</sub>               | 99714   | mp-510536    |
| Na      | 1               | Na <sub>2</sub> O              | 180570  | mp-2352      |
| Nb      | 4               | NbO <sub>2</sub>               | 35181   | mp-557057    |
| Nb      | 5               | Nb <sub>2</sub> O <sub>5</sub> | 25750   |              |
| Nd      | 3               | Nd <sub>2</sub> O <sub>3</sub> | 645664  | mp-1045      |
| Ni      | 2               | NiO                            | 61318   | mp-19009     |
| Os      | 4               | OsO <sub>2</sub>               | 30400   | mp-996       |
| P       | 5               | P <sub>2</sub> O <sub>5</sub>  | 40865   | mp-562613    |
| Pb      | 2               | PbO                            | 99777   | mp-672237    |
| Pb      | 4               | PbO <sub>2</sub>               | 43460   | mp-20725     |
| Pd      | 4               | PdO <sub>2</sub>               | 647283  | mp-1018886   |
| Pd      | 2               | PdO                            | 29281   | mp-1336      |
| Pr      | 3               | Pr <sub>2</sub> O <sub>3</sub> | 96203   | mp-16705     |

Continued from previous page

| Element | Oxidation State | Binary Oxide                   | ICSD ID | Materials ID |
|---------|-----------------|--------------------------------|---------|--------------|
| Pr      | 4               | PrO <sub>2</sub>               | 647300  | mp-1302      |
| Pt      | 2               | PtO                            | 164290  | mp-7947      |
| Pt      | 4               | PtO <sub>2</sub>               | 647320  | mp-1285      |
| Pu      | 4               | PuO <sub>2</sub>               | 55456   | mp-1959      |
| Rb      | 1               | Rb <sub>2</sub> O              | 180572  | mp-1394      |
| Re      | 4               | ReO <sub>2</sub>               | 24060   | mp-7228      |
| Rh      | 3               | Rh <sub>2</sub> O <sub>3</sub> | 108941  | mp-542734    |
| Sc      | 3               | Sc <sub>2</sub> O <sub>3</sub> | 647397  | mp-216       |
| Se      | 4               | SeO <sub>2</sub>               | 59712   | mp-726       |
| Si      | 4               | SiO <sub>2</sub>               | 200726  | mp-7000      |
| Sm      | 3               | Sm <sub>2</sub> O <sub>3</sub> | 647461  | mp-218       |
| Sn      | 4               | SnO <sub>2</sub>               | 39173   | mp-856       |
| Sr      | 2               | SrO                            | 180194  | mp-2472      |
| Tc      | 4               | TcO <sub>2</sub>               | 173152  | mp-33137     |
| Ta      | 5               | Ta <sub>2</sub> O <sub>5</sub> | -       | mvc-4415     |
| Tb      | 3               | Tb <sub>2</sub> O <sub>3</sub> | 40474   | mp-1056      |
| Tb      | 4               | TbO <sub>2</sub>               | 647500  | mp-2458      |
| Te      | 4               | TeO <sub>2</sub>               | 26844   | mp-2125      |
| Ti      | 3               | Ti <sub>2</sub> O <sub>3</sub> | 77696   | mp-458       |
| Ti      | 4               | TiO <sub>2</sub>               | 202240  | mp-2657      |
| Tl      | 1               | Tl <sub>2</sub> O              | 16220   | mp-27484     |
| Tl      | 3               | Tl <sub>2</sub> O <sub>3</sub> | 74090   | mp-1658      |
| Tm      | 3               | Tm <sub>2</sub> O <sub>3</sub> | 647581  | mp-1767      |
| V       | 3               | V <sub>2</sub> O <sub>3</sub>  | 260212  | mp-25787     |
| V       | 4               | VO <sub>2</sub>                | 1504    | mp-19094     |
| V       | 5               | V <sub>2</sub> O <sub>5</sub>  | 99808   | mp-25620     |
| W       | 4               | WO <sub>2</sub>                | 8217    | mp-19372     |

**Continued from previous page**

| Element | Oxidation State | Binary Oxide                   | ICSD ID | Materials ID |
|---------|-----------------|--------------------------------|---------|--------------|
| Y       | 4               | Y <sub>2</sub> O <sub>3</sub>  | 23811   | mp-2652      |
| Yb      | 3               | Yb <sub>2</sub> O <sub>3</sub> | 62872   | mp-2814      |
| Zn      | 2               | ZnO                            | 647681  | mp-2133      |
| Zr      | 4               | ZrO <sub>2</sub>               | 172161  | mp-2858      |

**Supplementary Table 3 | Species on the C, A and D sites in garnet, adapted from ref. <sup>1</sup>**

| Site | Ions                                                                                                                                                                                                                                                                                                                                                                                                                                                                   |
|------|------------------------------------------------------------------------------------------------------------------------------------------------------------------------------------------------------------------------------------------------------------------------------------------------------------------------------------------------------------------------------------------------------------------------------------------------------------------------|
| A    | Li <sup>+</sup> , Dy <sup>3+</sup> , Y <sup>3+</sup> , Ho <sup>3+</sup> , Er <sup>3+</sup> , Tm <sup>3+</sup> , Lu <sup>3+</sup> , Hf <sup>4+</sup> , Mg <sup>2+</sup> , Zr <sup>4+</sup> , Sc <sup>3+</sup> , Ta <sup>5+</sup> , Ti <sup>4+</sup> , Nb <sup>5+</sup> ,<br>Al <sup>3+</sup> , Zn <sup>2+</sup> , Cr <sup>3+</sup> , In <sup>3+</sup> , Ga <sup>3+</sup> , Sn <sup>4+</sup> , Ge <sup>4+</sup> , Sb <sup>5+</sup> , Ru <sup>4+</sup> , Rh <sup>3+</sup> |
| C    | Ba <sup>2+</sup> , Na <sup>+</sup> , Sr <sup>2+</sup> , Ca <sup>2+</sup> , Tb <sup>3+</sup> , La <sup>3+</sup> , Pr <sup>3+</sup> , Nd <sup>3+</sup> , Sm <sup>3+</sup> , Gd <sup>3+</sup> , Eu <sup>3+</sup> , Dy <sup>3+</sup> , Y <sup>3+</sup> , Ho <sup>3+</sup> ,<br>Er <sup>3+</sup> , Tm <sup>3+</sup> , Lu <sup>3+</sup> , Hf <sup>4+</sup> , Mg <sup>2+</sup> , Zr <sup>4+</sup> , Zn <sup>2+</sup> , Cd <sup>2+</sup> , Bi <sup>3+</sup>                    |
| D    | Li <sup>+</sup> , Ti <sup>4+</sup> , Al <sup>3+</sup> , Ga <sup>3+</sup> , Si <sup>4+</sup> , Sn <sup>4+</sup> , Ge <sup>4+</sup> , As <sup>5+</sup> , P <sup>5+</sup>                                                                                                                                                                                                                                                                                                 |

**Supplementary Table 4 | Accuracy of DFT formation energies versus experiments.**

| Formula                                                         | $E_f^{EXP}$ (meV atom <sup>-1</sup> ) | $E_f^{DFT}$ (meV atom <sup>-1</sup> ) | Source            |
|-----------------------------------------------------------------|---------------------------------------|---------------------------------------|-------------------|
| Dy <sub>3</sub> Al <sub>5</sub> O <sub>12</sub>                 | -51 <sup>1</sup>                      | -54                                   | Ref. <sup>2</sup> |
| Ho <sub>3</sub> Al <sub>5</sub> O <sub>12</sub>                 | -53 <sup>1</sup>                      | -51                                   | Ref. <sup>2</sup> |
| Er <sub>3</sub> Al <sub>5</sub> O <sub>12</sub>                 | -50 <sup>1</sup>                      | -49                                   | Ref. <sup>2</sup> |
| Tm <sub>3</sub> Al <sub>5</sub> O <sub>12</sub>                 | -50 <sup>1</sup>                      | -46                                   | Ref. <sup>2</sup> |
| Lu <sub>3</sub> Al <sub>5</sub> O <sub>12</sub>                 | -38 <sup>1</sup>                      | -37                                   | Ref. <sup>2</sup> |
| Y <sub>3</sub> Al <sub>5</sub> O <sub>12</sub>                  | -60 <sup>1</sup>                      | -51                                   | Ref. <sup>2</sup> |
| Sm <sub>3</sub> Ga <sub>5</sub> O <sub>12</sub>                 | -76 <sup>1</sup>                      | -67                                   | Ref. <sup>2</sup> |
| Eu <sub>3</sub> Ga <sub>5</sub> O <sub>12</sub>                 | -72 <sup>1</sup>                      | -28                                   | Ref. <sup>2</sup> |
| Gd <sub>3</sub> Ga <sub>5</sub> O <sub>12</sub>                 | -76 <sup>1</sup>                      | -53                                   | Ref. <sup>2</sup> |
| Dy <sub>3</sub> Ga <sub>5</sub> O <sub>12</sub>                 | -62 <sup>1</sup>                      | -53                                   | Ref. <sup>2</sup> |
| Ho <sub>3</sub> Ga <sub>5</sub> O <sub>12</sub>                 | -66 <sup>1</sup>                      | -48                                   | Ref. <sup>2</sup> |
| Er <sub>3</sub> Ga <sub>5</sub> O <sub>12</sub>                 | -62 <sup>1</sup>                      | -44                                   | Ref. <sup>2</sup> |
| Tm <sub>3</sub> Ga <sub>5</sub> O <sub>12</sub>                 | -56 <sup>1</sup>                      | -38                                   | Ref. <sup>2</sup> |
| Lu <sub>3</sub> Ga <sub>5</sub> O <sub>12</sub>                 | -45 <sup>1</sup>                      | -25                                   | Ref. <sup>2</sup> |
| Y <sub>3</sub> Ga <sub>5</sub> O <sub>12</sub>                  | -69 <sup>1</sup>                      | -52                                   | Ref. <sup>2</sup> |
| Ca <sub>3</sub> Al <sub>2</sub> Si <sub>3</sub> O <sub>12</sub> | -169                                  | -132                                  | Ref. <sup>3</sup> |

<sup>1</sup> Measured at 977 K.



$E_f^{EXP}$  is the enthalpy of formation of garnets from binary oxides, i.e., the enthalpy change of the reaction  $3/2 \text{Ln}_2\text{O}_3 + 5/2 \text{M}_2\text{O}_3 \rightarrow \text{Ln}_3\text{M}_5\text{O}_{12}$  (Ln = Rare Earth, M=Al, Ga), and  $E_f^{DFT}$  is the DFT computed formation energy based on the same reaction. The mean absolute error (MAE) between  $E_f^{EXP}$  and  $E_f^{DFT}$  is  $\sim 14 \text{ meV atom}^{-1}$ .

**Supplementary Table 5 | Species on the A and B sites in perovskites**

| Site | Ions                                                                                                                                                                                                                                                                                                                                                                                                                                                                                                                                                                                                                                                                                                                                                                                                                                                                                                                                                                                                                            |
|------|---------------------------------------------------------------------------------------------------------------------------------------------------------------------------------------------------------------------------------------------------------------------------------------------------------------------------------------------------------------------------------------------------------------------------------------------------------------------------------------------------------------------------------------------------------------------------------------------------------------------------------------------------------------------------------------------------------------------------------------------------------------------------------------------------------------------------------------------------------------------------------------------------------------------------------------------------------------------------------------------------------------------------------|
| A    | Ba <sup>2+</sup> , Sr <sup>2+</sup> , Ca <sup>2+</sup> , La <sup>3+</sup> , Tb <sup>3+</sup> , Ce <sup>3+</sup> , Ce <sup>4+</sup> , Pr <sup>3+</sup> , Nd <sup>3+</sup> , Sm <sup>3+</sup> , Gd <sup>3+</sup> , Dy <sup>3+</sup> , Y <sup>3+</sup> ,<br>Ho <sup>3+</sup> , Er <sup>3+</sup> , Tm <sup>3+</sup> , Mg <sup>2+</sup> , Sc <sup>3+</sup> , Mn <sup>2+</sup> , Al <sup>3+</sup> , Tl <sup>3+</sup> , Zn <sup>2+</sup> , Cd <sup>2+</sup> , Ni <sup>2+</sup> , Sn <sup>4+</sup> , Bi <sup>3+</sup> ,<br>Pd <sup>2+</sup> , Pt <sup>2+</sup> , Rh <sup>3+</sup> , Pb <sup>2+</sup>                                                                                                                                                                                                                                                                                                                                                                                                                                    |
| B    | La <sup>3+</sup> , Tb <sup>3+</sup> , Ce <sup>3+</sup> , Ce <sup>4+</sup> , Pr <sup>3+</sup> , Nd <sup>3+</sup> , Sm <sup>3+</sup> , Eu <sup>3+</sup> , Gd <sup>3+</sup> , Dy <sup>3+</sup> , Y <sup>3+</sup> , Ho <sup>3+</sup> , Er <sup>3+</sup> ,<br>Tm <sup>3+</sup> , Lu <sup>3+</sup> , Hf <sup>4+</sup> , Mg <sup>2+</sup> , Zr <sup>4+</sup> , Sc <sup>3+</sup> , Ta <sup>5+</sup> , Ti <sup>4+</sup> , Mn <sup>2+</sup> , Mn <sup>4+</sup> , Al <sup>3+</sup> , Tl <sup>3+</sup> , V <sup>5+</sup> ,<br>Zn <sup>2+</sup> , Cr <sup>3+</sup> , In <sup>3+</sup> , Ga <sup>3+</sup> , Fe <sup>2+</sup> , Fe <sup>3+</sup> , Co <sup>2+</sup> , Co <sup>3+</sup> , Cu <sup>2+</sup> , Re <sup>4+</sup> , Si <sup>4+</sup> , Tc <sup>4+</sup> , Ni <sup>2+</sup> , Sn <sup>4+</sup> ,<br>Ge <sup>4+</sup> , Bi <sup>3+</sup> , Mo <sup>4+</sup> , Ir <sup>4+</sup> , Os <sup>4+</sup> , Pd <sup>4+</sup> , Ru <sup>4+</sup> , Pt <sup>4+</sup> , Rh <sup>3+</sup> , Pb <sup>4+</sup> , W <sup>4+</sup> , Au <sup>3+</sup> |

## Supplementary References

1. Granat-struktur, D., Übersicht, E., Kationen, D. & Ionenverteilung, D. Crystal Chemistry of the Garnet. *Zeitschrift für Krist. - Cryst. Mater.* **47**, 1989 (1999).
2. Kanke, Y. & Navrotsky, A. A Calorimetric Study of the Lanthanide Aluminum Oxides and the Lanthanide Gallium Oxides: Stability of the Perovskites and the Garnets. *J. Solid State Chem.* **141**, 424–436 (1998).
3. Cemič, L. *Thermodynamics in mineral sciences: An introduction. Thermodynamics in Mineral Sciences: An Introduction* (Springer-Verlag, 2005).
4. Kubaschewski, O., Alcock, C. B. & Spencer, P. J. *Materials thermochemistry*. (Pergamon Press, 1993).
