# Supplementary material for: Deep neural networks for accurate predictions of crystal stability
Source: Springer Nature journal article supplement (doi:10.1038/s41467-018-06322-x), 2018-09-12
Supplement: 41467_2018_6322_MOESM2_ESM.pdf [file 41467_2018_6322_MOESM2_ESM.pdf]

Editorial Note: This manuscript has been previously reviewed at another journal that is not operating a transparent peer review scheme. The manuscript was considered suitable for publication without further review at *Nature Communications*.
